# Supplementary material
Source: PubMed Central journal article supplement (PMC6962577)
Supplement: NIHMS1535916-supplement-1.pdf [file NIHMS1535916-supplement-1.pdf]

**Table S1: GelMA/Collagen Formulations**

| <b>E' (kPa)</b> | <b>Final Collagen (mg/mL)</b> | <b>GelMA (20% w/v) (<math>\mu</math>L)</b> | <b>Collagen (10 mg/mL) (<math>\mu</math>L)</b> | <b>10X PBS (<math>\mu</math>L)</b> | <b>LAP (1%) (<math>\mu</math>L)</b> | <b>DMEM (<math>\mu</math>L)</b> |
|-----------------|-------------------------------|--------------------------------------------|------------------------------------------------|------------------------------------|-------------------------------------|---------------------------------|
| <b>2</b>        | <b>1.5</b>                    | <i>360 0.25M</i>                           | <i>216</i>                                     | <i>24</i>                          | <i>50</i>                           | <i>350</i>                      |
| <b>12</b>       | <b>1.5</b>                    | <i>250 7M</i>                              | <i>150</i>                                     | <i>17</i>                          | <i>50</i>                           | <i>533</i>                      |

**Table S1:** Example prepolymer formulations for 1 mL volume of the 2 and 12 kPa GelMA/Coll hydrogels

**Table S2: Mean and standard deviation for number of invading cells per spheroid**

| Figure | Condition                  | Invading Cells (Mean $\pm$ SD) |
|--------|----------------------------|--------------------------------|
| Fig 1B | Low 24 hr                  | 33.6 $\pm$ 3.4                 |
|        | Low 48 hr                  | 62.8 $\pm$ 18.4                |
|        | Low 72 hr                  | 122.6 $\pm$ 34.4               |
|        | High 24 hr                 | 0.8 $\pm$ 0.8                  |
|        | High 48 hr                 | 4.9 $\pm$ 2.2                  |
|        | High 72 hr                 | 30.5 $\pm$ 7.3                 |
| Fig 2C | Low Control                | 162.4 $\pm$ 37.1               |
|        | Low +GM6001                | 86.9 $\pm$ 22.1                |
|        | High Control               | 34.5 $\pm$ 10.3                |
|        | High +GM6001               | 0                              |
| Fig 3D | Low siScr                  | 114.0 $\pm$ 15.5               |
|        | Low siMena                 | 113.1 $\pm$ 33.8               |
|        | High siScr                 | 41.8 $\pm$ 12.0                |
|        | High siMena                | 14.5 $\pm$ 5.7                 |
| Fig 4D | Low Control                | 120.5 $\pm$ 18.8               |
|        | Low 0 hr PLCg inhibition   | 114.6 $\pm$ 23.1               |
|        | Low 24 hr PLCg inhibition  | 127.2 $\pm$ 28.0               |
|        | High Control               | 46.2 $\pm$ 10.2                |
|        | High 0 hr PLCg inhibition  | 19.8 $\pm$ 7.1                 |
|        | High 24 hr PLCg inhibition | 46.0 $\pm$ 9.9                 |
| Fig 6D | Low Control for cFN        | 113.2 $\pm$ 16.6               |
|        | Low + cFN                  | 100.1 $\pm$ 15.7               |
|        | High Control for cFN       | 26.4 $\pm$ 9.8                 |
|        | High + cFN                 | 49.4 $\pm$ 12.2                |
|        | Low siScr                  | 98.0 $\pm$ 26.1                |
|        | Low siFN                   | 111.1 $\pm$ 26.3               |
|        | High siScr                 | 50.3 $\pm$ 13.2                |
|        | High siFN                  | 21.3 $\pm$ 9.8                 |
| Fig 7C | Low Control                | 96.6 $\pm$ 24.0                |
|        | Low + irigenin             | 104.7 $\pm$ 17.6               |
|        | High Control               | 50.1 $\pm$ 10.9                |
|        | High + irigenin            | 17.2 $\pm$ 6.3                 |

**Table S2:** Mean and standard deviations for the number of invading cells per spheroid used to determine the fold change differences shown in Figures 1-7.

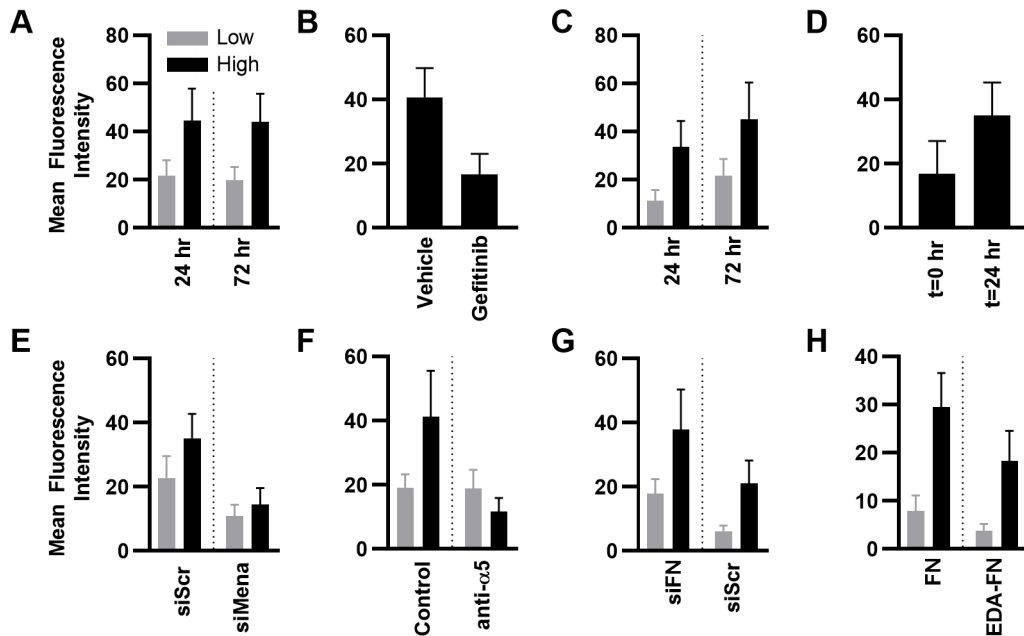

Figure S1: Mean fluorescence intensities of immunofluorescent stainings shown in the main figures. For each image set,  $n=3$  spheroids were imaged and data show is mean and SD. A.) Mena was increased in high stiffness gels; however, staining intensity was unaffected by length of culture time. Corresponds to Figure 3A. B.) Treatment of high stiffness gels with the EGFR inhibitor gefitinib drastically reduced Mena at 72 hours post embedding. Corresponds to Figure 4A. C.) pPLC $\gamma$ 1 was increased in high stiffness gels and this difference persisted throughout the culture. Corresponds to Figure 4B. D.) Inhibiting PLC $\gamma$ 1 directly after embedding (t=0 hr) reduced Mena levels at 72 hours of culture in high stiffness gels compared to inhibition at t=24 hr. Corresponds to Figure 4C. E.) siRNA knockdown of Mena reversed the increase in fibronectin signal associated with stiffness. Corresponds to Figure 5B. F.) Fibronectin signal was decreased in the high stiffness gels through inhibition of  $\alpha$ 5 integrin. Corresponds to Figure 5C. G.) Knocking down fibronectin with siRNA reduced the intensity of fibronectin staining in both low and high stiffness gels. Corresponds to Figure 6B. H.) Total fibronectin and EDA-fibronectin signal were greatly increased in high stiffness gels. Corresponds to Figure 7A.

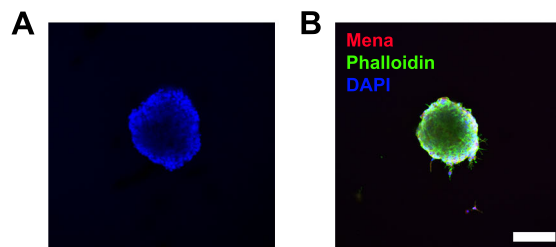

**Figure S2: GelMA-only 12 kPa hydrogels failed to replicate results observed in GelMA/Coll gels. A.) MDA-MB-231 spheroids were stained with DAPI at 72 hours post embedding and showed no cell invasion occurred over the duration of the experiment. B.) Staining for Mena demonstrated an almost complete lack of the protein in the 12 kPa GelMA-only gels. Scale bar=150  $\mu$ m.**

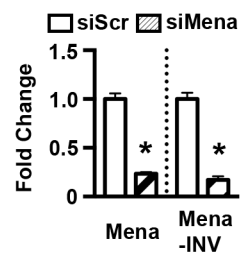

Figure S3: siMena treatment reduced MENA expression in spheroids 24 hours after generation. Treatment with the siRNA decreased expression of MENA and MENA-INV to a similar extent. \* denotes  $p < 0.05$  relative to siScr,  $n = 3$  pools of  $> 50$  spheroids.

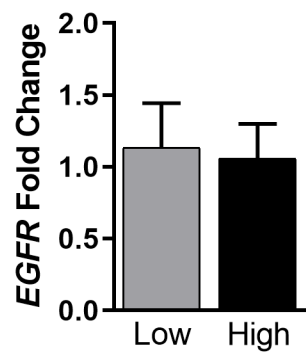

**Figure S4:** Scaffold stiffness did not affect gene expression of EGFR at 24 hr. n=3 pools of >50 embedded spheroids.

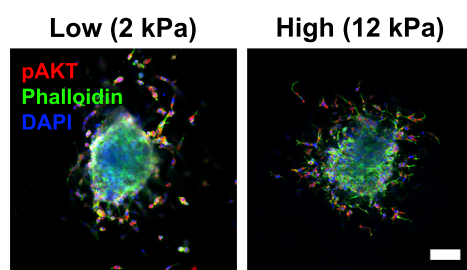

**Figure S5: Scaffold stiffness did not substantially affect phosphorylation of Akt at Ser473. At both low and high stiffnesses, pAkt levels and distribution were similar at 72 hr post embedding (rabbit primary monoclonal antibody, Cell Signaling Technologies 193H12, 1:100 dilution, Danvers, MA). Scale bar=100  $\mu$ m.**

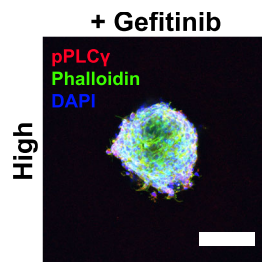

**Figure S6: Inhibition of EGFR activity significantly decreased phosphorylation of PLC $\gamma$ . Treatment with gefitinib, an irreversible EGFR inhibitor, eliminated most of the signal from pPLC $\gamma$  immunofluorescent staining. Scale bar=150  $\mu$ m.**



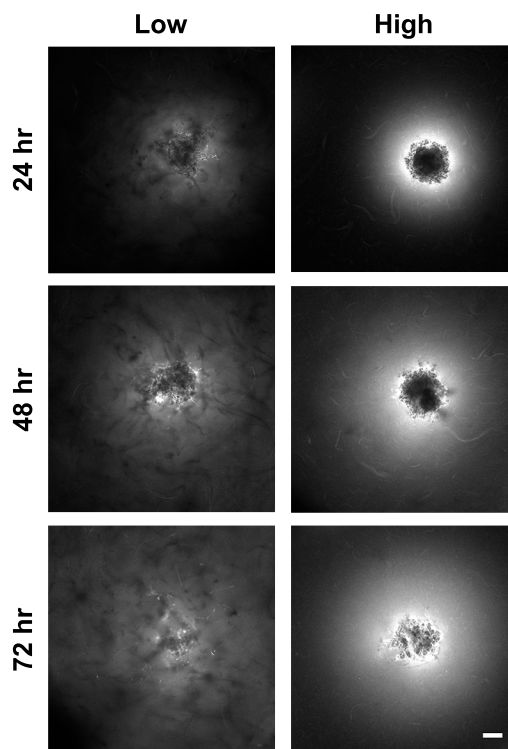

**Figure S7: Unprocessed fluorescence images of fibronectin halos. Samples were fixed and imaged for fibronectin content via immunofluorescent staining. The raw fluorescent images for low and high gel stiffnesses at 24, 48, and 72 hours are shown and correspond to the heatmap images presented in Figure 5A. Scale bar = 100  $\mu$ m**

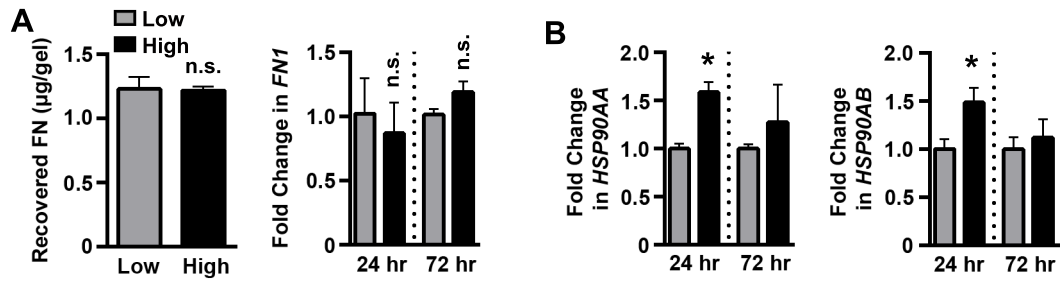

Figure S8: Fibronectin amount and secretion is similar between low and high stiffness conditions. A.) Fibronectin recovered from digested gels (left) and FN1 expression (right) were similar between the 2 and 12 kPa gels. n=3 pools of >50 embedded spheroids. B.) Expression of HSP90A (left) and HSP90B (right), molecular chaperones involved in the secretion of fibronectin, were modestly upregulated in 12 kPa gels at early timepoints (24 hr), but this difference disappeared at the later timepoints (72 hr). \* denotes  $p < 0.05$  relative to low stiffness condition, n=3 pools of >50 embedded spheroids.

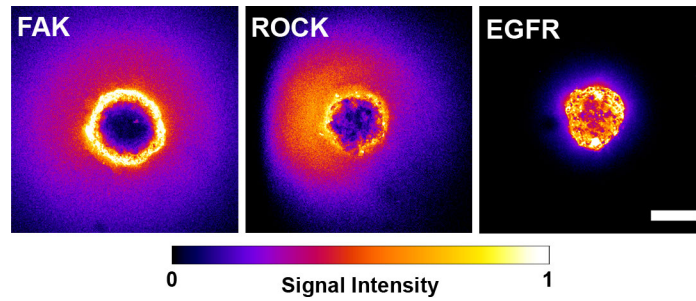

**Figure S9:** The development of the fibronectin halo is dependent upon EGFR signaling. Inhibition of FAK or ROCK, proteins involved in mechanosensing, did not affect the intensity or spread of the halo in 12 kPa gels at 72 hrs post embedding, while inhibition of EGFR with gefitinib ablated the halo. ROCK was inhibited by addition of 10  $\mu$ M Y-27632 (Tocris Biosciences, Minneapolis, MN) in media after cell embedding, FAK was inhibited via the addition of 5  $\mu$ M PF-573228 (Selleck Chem, Houston, TX). Scale bar=150  $\mu$ m.

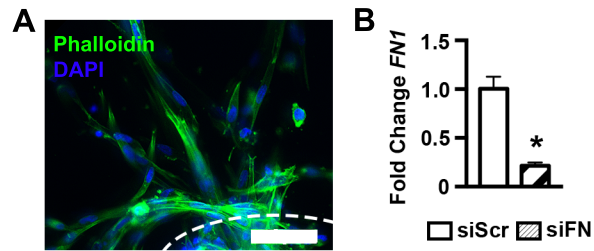

**Figure S10:** Fibronectin levels were manipulated by the addition of exogenous protein or the elimination of endogenous production. A.) Exogenous cFN did not affect cell morphology in 2 kPa scaffolds. Scale bar=50 μm. B.) siFN1 treatment reduced endogenous FN1 expression in spheroids 24 hours after generation. \* denotes  $p < 0.05$  relative to siScr,  $n = 3$  pools of >50 spheroids.

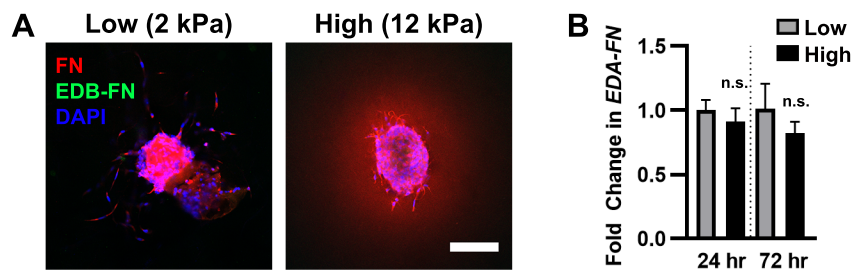

**Figure S11: The EDB-fibronectin isoform is not present in the fibronectin halo and EDA-fibronectin gene expression is not upregulated in stiff matrices. A.)** At 72 hr post embedding, no staining for EDB-fibronectin was observed in either the low or high stiffnesses. EDB-FN primary mouse monoclonal antibody BC-1 was used (Abcam, cat#: ab154210, 1:100 dilution). Scale bar = 150  $\mu$ m. **B.)** Gene expression of EDA-fibronectin was similar in spheroids embedded in low and high stiffness gels at both 24 and 72 hours post embedding. n=3 pools of >50 embedded spheroids.
